# Supplementary material for: Fruits, vegetables and their polyphenols protect dietary lipids from oxidation during gastric digestion
Source: Royal Society of Chemistry journal article supplement (doi:10.1039/c4fo00269e), 2014-06-17

Supporting information S1.

Microscopy of a gastric digesta 90 min after the ingestion of the polyphenol extract (PE) meal (after dilution with water). Microscope Olympus IMT-2, 20X magnification.

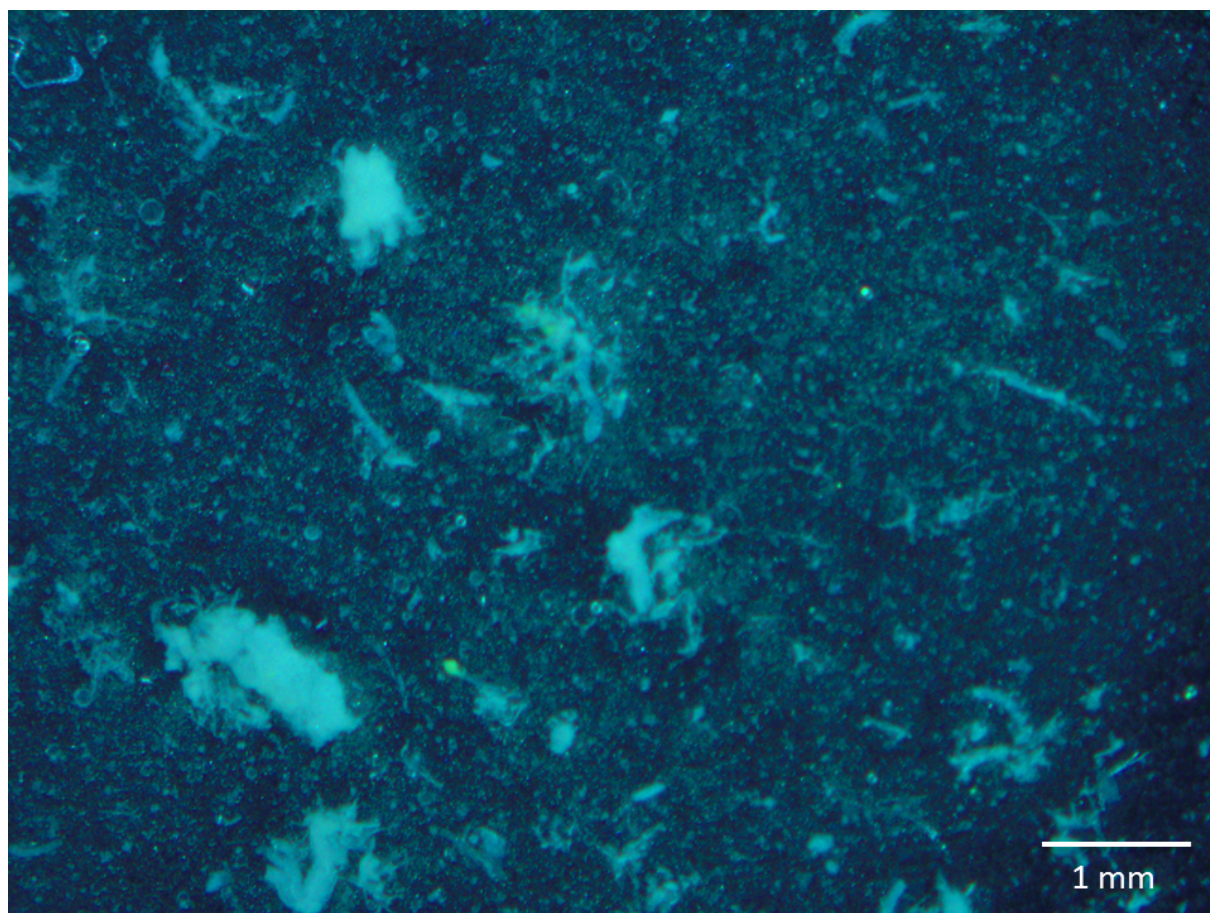

Supplement: c4fo00269e1.pdf [file c4fo00269e1.pdf]
