# Supplementary material for: Fruits, vegetables and their polyphenols protect dietary lipids from oxidation during gastric digestion
Source: Royal Society of Chemistry journal article supplement (doi:10.1039/c4fo00269e), 2014-06-17
Supplement: c4fo00269e2.pdf [file c4fo00269e2.pdf]

## Supporting information S2. Qualitative and quantitative characterizations of the polyphenol extract

| Compound <sup>a</sup>                                | Content in the extract (mg) <sup>b</sup> | Contributors                              |
|------------------------------------------------------|------------------------------------------|-------------------------------------------|
| <b>3-Caffeoylquinic acid</b>                         | 10.85                                    | Plum (91%), artichoke (9%)                |
| <b>Dimer B</b>                                       | Nq                                       | Apple (tr.)                               |
| <b>Dimer B1</b>                                      | 4.86                                     | Apple (94%), plum (6%)                    |
| <b><i>p</i>-Coumaroylquinic acid</b>                 | 0.17                                     | Plum (tr.)                                |
| <b>Catechin</b>                                      | 4.17                                     | Apple (86%), plum (14%)                   |
| <b>Dimer B</b>                                       | 0.83                                     | Apple (tr.)                               |
| <b>Chlorogenic acid</b>                              | 53.37                                    | Artichoke (71%), apple (28%), plum (1%)   |
| <b>Dimer B2</b>                                      | 8.16                                     | Apple                                     |
| <b>4-Caffeoylquinic acid</b>                         | 1.85                                     | Artichoke                                 |
| <b>dimer B</b>                                       | 1.93                                     | Apple (tr.)                               |
| <b>1,3-Dicaffeoylquinic acid or cynarin</b>          | 0.26                                     | Artichoke                                 |
| <b>Epicatechin</b>                                   | 3.83                                     | Apple                                     |
| <b>5-<i>p</i>-Coumaroylquinic acid</b>               | Nq                                       | Apple (tr.)                               |
| <b>chlorogenic acid (CIS)</b>                        | 2.91                                     | Apple (72%), artichoke (28%), plum (tr.)  |
| <b>4-<i>p</i>-Coumaroylquinic acid</b>               | 1.95                                     | Apple (100%), plum (tr.), artichoke (tr.) |
| <b>3,4-Dicaffeoylquinic acid</b>                     | 0.59                                     | Artichoke                                 |
| <b>3,5-Dicaffeoylquinic acid</b>                     | 22.73                                    | Artichoke (99.9%), plum (0.1%),           |
| <b>Quercetin hexoside (I)</b>                        | 0.76                                     | Apple                                     |
| <b>1,5-Dicaffeoylquinic acid</b>                     | 19.38                                    | Artichoke                                 |
| <b>Rutin (MIN) and quercetin hexoside (II) (MAJ)</b> | 1.14                                     | Apple (79%), plum (21%)                   |
| <b>Phloretin-2'-O-xyloglucoside</b>                  | 8.57                                     | Apple                                     |
| <b>4,5-Dicaffeoylquinic acid</b>                     | 2.67                                     | Artichoke                                 |
| <b>Phloridzin</b>                                    | 3.18                                     | Apple                                     |

<sup>a</sup> Structural assignment by mass spectrometry. <sup>b</sup> Content determined by UPLC using calibration curves with standards (chlorogenic acid, 3-caffeoylquinic acid, 4-caffeoylquinic acid, (+)-catechin, 3,5-dicaffeoylquinic acid, rutin, phloridzin).

Nq : not quantifiable. Tr : for traces.

Overall phenolic content in the extract = 154 mg
